# Supplementary material for: ORCA study: real-world versus reading centre assessment of disease activity of neovascular age-related macular degeneration (nAMD)
Source: PubMed Central journal article supplement — Br J Ophthalmol. 2020 Nov 1;104(11):1573–8. doi: 10.1136/bjophthalmol-2019-315717 (PMC7587226; doi:10.1136/bjophthalmol-2019-315717), 2020-11-01
Supplement: bjophthalmol-2019-315717s001.pdf [file bjophthalmol-2019-315717s001.pdf]

| Center (Hospital/Praxis)                                                              | Place             |
|---------------------------------------------------------------------------------------|-------------------|
| Praxis Dr. Hälbig, Wolfgang                                                           | Augsburg          |
| Praxis Dr. Brandt, Stefanus                                                           | Aurich            |
| Gemeinschaftspraxis Dr. Ruf, Dr. Wille                                                | Bad Gandersheim   |
| Praxis Tyrtania, Thomas Dr.                                                           | Bad Kreuznach     |
| Praxis Dr. Schmidt-Betschel, Wolfram                                                  | Bad Wildungen     |
| Gemeinschaftspraxis Dr. König, Dr. Wißmann                                            | Baden - Baden     |
| Gemeinschaftspraxis Dr. Maximiliane Klatt, Dr. Alexander Klatt, Dr. Fabia Müller-Groh | Bassum            |
| Augenzentrum Lichterfelde West Dr. Wiemer, Dr. Kaulen, Dr. Hänsgen, Dr. Galanski      | Berlin            |
| Gemeinschaftspraxis Dr. Gross, Bastienne Viehrig                                      | Berlin            |
| Gemeinschaftspraxis Dr. Pache, Dr. Planert, Dr. Engelhardt, Dr. Kube                  | Bielefeld         |
| Augenklinik-Augenarztpraxis Schloss carré Dr. Grohmann, Dr. Kamouna (Dr. Llacer)      | Braunschweig      |
| Praxis Dr. Grüb, Mathias                                                              | Breisach am Rhein |
| Krankenhaus St. Joseph-Stift GmbH (Oberarzt Dr. Cil)                                  | Bremen            |
| Gemeinschaftspraxis Dr. Berger, Dr. Niehuus                                           | Bremerhaven       |
| Praxis Dr. Lauritzen, Kyra                                                            | Buchholz          |
| Praxis Dr. Brohr, Stephan                                                             | Burghausen        |
| Gemeinschaftspraxis Dr. Stolzenberg, Dr. Haupeitshofer                                | Castrop-Rauxel    |
| Praxis Dr. Niederstraße, Dirk                                                         | Cuxhaven          |
| Gemeinschaftspraxis Dres Steiner                                                      | Dannenberg        |
| Klinikum Darmstadt GmbH (Prof. Emmerich)                                              | Darmstadt         |
| Praxis Krause, Roswitha Dr.                                                           | Dortmund          |
| Gemeinschaftspraxis Dr. Müller-Holz , Dr. Riedel                                      | Dresden           |
| Universitätsklinikum Augenklinik Düsseldorf Dr. Guthoff, Rainer                       | Düsseldorf        |
| IIO (Internationale Innovative Ophthalmochirurgie) (Kaymak, Hakan)                    | Düsseldorf        |
| Praxis Dr. Mohammadi, Babak                                                           | Düsseldorf        |
| Augenklinik Flensburg Treumer, H. Prof. Dr. med. (Elshinnawi, Ahmed)                  | Flensburg         |
| Praxis Dr. Brändle, Jürg                                                              | Füssen            |
| Praxis Dr. Externbrink, Piet                                                          | Geseke            |
| Praxis Fontana, Rainer Dr.                                                            | Grünstadt         |
| Praxis Dr. Machnik, Bertram                                                           | Hamburg           |
| Gemeinschaftspraxis Dr. Kaupke, Görges, Dr. Miebach                                   | Hamburg           |
| Praxis Dr. Wichmann, Wolfgang                                                         | Hannover          |
| KRH Klinikum Nordstadt (Prof. Dr. Burkhard Wiechens)                                  | Hannover          |
| Praxis Dr. Pfeufer, Eva-Maria                                                         | Hildburghausen    |
| Gemeinschaftspraxis Dr. Schmucker, Dr. Pusch                                          | Hirschaid         |
| Gemeinschaftspraxis Dr. Stephan Kilias, Urte Fetter, Dr. Ingmar Fetter                | Hoppegarten       |
| Praxis Dres. Maier und Liedtke-Maier                                                  | Hösbach           |
| Praxis Dr. Grasbon, Thomas                                                            | Ingolstadt        |
| Augen Allianz Zentrum Bayern Mitte (Dr. Sandra Oehmig)                                | Ingolstadt        |
| Gemeinschaftspraxis Dr. Berens, Dr. Schumacher, Dr. Saschin                           | Karlsruhe         |
| Augenzentrum Koblenz (Dr. Berenstein)                                                 | Koblenz           |
| St. Elisabeth-Krankenhaus Klinik für Augenheilkunde (Dr. Berk)                        | Köln              |
| Augen + Laserzentrum (Dr. Kiraly)                                                     | Leipzig           |
| Praxis Dr. David, Martina                                                             | Lohne             |

| Center (Hospital/Praxis)                                              | Place             |
|-----------------------------------------------------------------------|-------------------|
| Praxis Dres. Burkhard Burkhard, Carsten Dr.                           | Lohne             |
| Gemeinschaftspraxis Dr. Beckendorf, Dr. Kleineidam, Dr. Kruse         | Lübeck            |
| Universitätsklinikum LübeckKlinik für Augenheilkunde (Prof. Grisanti) | Lübeck            |
| Gemeinschaftspraxis Dr. Asani und Kollegen (Fr. Kjata, Azra)          | Lünen             |
| Gemeinschaftspraxis Prof. Dr. Neuhann (Dr. Bornhauser)                | München           |
| Praxis Dr. Socrates Dimitriou (Dr. Schultmeyer)                       | München           |
| Augenklinik Airport München (Bechmann, Martin)                        | München-Flughafen |
| Westfälische-Wilhelms-Universität Münster (Prof. Eter)                | Münster           |
| Praxis Tesnau, Renata Dr.                                             | Mutterstadt       |
| Praxis Dr. Wildner, Bodo                                              | Neustadt          |
| Praxis Dr. Wildner, Annette                                           | Neustadt          |
| Praxis Dr. Winkler von Mohrenfels, Christoph                          | Neutraubling      |
| Praxis Dr. Gockeln, Roland                                            | Nienburg          |
| Gemeinschaftspraxis Dr. Lanzrath, Dr. Schlese, Dr. Breuer             | Oldenburg         |
| Praxis Lenz, Christof Dr.                                             | Paderborn         |
| Praxis Dr. Garus, Lena                                                | Pfaffenhofen      |
| Gemeinschaftspraxis Dr. Kallmann, Fanihagh & Partner (Fanihagh)       | Ratingen          |
| Gemeinschaftspraxis Dr. Kallmann, Fanihagh & Partner (Dr. Kallmann)   | Ratingen          |
| Gemeinschaftspraxis Dr. Claus Fuchs, Dr. Barbara Fuchs-Koelwel        | Regensburg        |
| Praxis Dr. Scheffler, Martin                                          | Rhauderfehn       |
| Augenarztpraxis Rostock Mitte                                         | Rostock           |
| Praxis Kirchhoff, Ulrike Dr.                                          | Rotenburg         |
| Belenus Augenzentrum, Gemeinschaftspraxis Dres. Frank, Fuchs, Briesen | Siegen            |
| Praxis Dipl. Med. Landmann, Heike                                     | Stendal           |
| Praxis Dr. Czechowski, Edelgard                                       | Stendal           |
| Praxis Dr. Kaiser, Adam                                               | Stuttgart         |
| Praxis Grote-Schmidt, Annette Dr.                                     | Tönisvorst        |
| Universitätsaugenklinik Tübingen (Prof. Dr. Ziemssen)                 | Tübingen          |
| Praxis Dr. Hufenbach, Ulrich                                          | Wernigerode       |
| Gemeinschaftspraxis Timm, A., Dr. Beyer, Marion                       | Wismar            |
| Praxis Steinbach, Claus-Michael Dr.                                   | Wuppertal         |
| Praxis Murovski, Simo Dr. (Univ. Skopje)                              | Zschopau          |
